# Supplementary material for: Use of the peroxidase mimetic activity of erythrocyte-like Cu1.8S nanoparticles in the colorimetric determination of glutathione
Source: Royal Society of Chemistry journal article supplement (doi:10.1039/c6ay03034c), 2017-01-01
Supplement: c6ay03034c1.pdf [file c6ay03034c1.pdf]

## Supporting Information

### Scavenging the peroxidase mimetic activity of erythrocyte-like $\text{Cu}_{1.8}\text{S}$ nanoparticles for colorimetric detection of glutathione

Hongyan Zou,<sup>a</sup> Tong Yang,<sup>a</sup> Jing Lan<sup>a</sup> and Chengzhi Huang<sup>a\*</sup>

<sup>a</sup>Key Laboratory of Luminescent and Real-Time Analytical Chemistry, Ministry of Education, College of Pharmaceutical Sciences, Southwest University, Chongqing 400715, China.

\*E-mail: chengzhi@swu.edu.cn

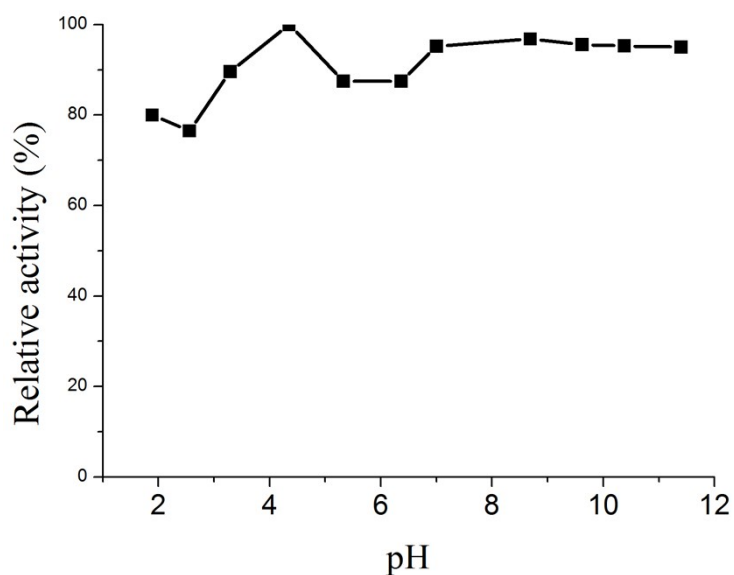

Figure S1. pH-dependent peroxidase-like activity study for  $\text{Cu}_{1.8}\text{S}$  NPs

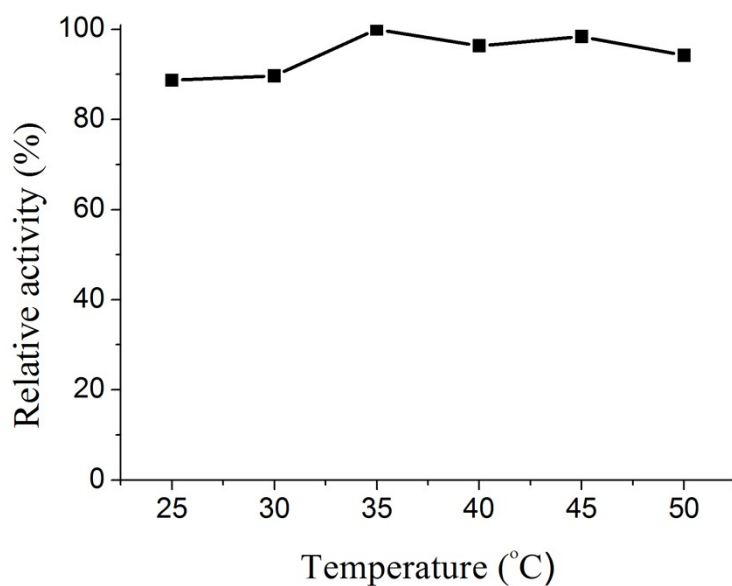

Figure S2. Temperature dependent peroxidase-like activity study for Cu<sub>1.8</sub>S NPs

**Table S1** Comparison of the linear range and the detect limit for GSH using different analytical methods

| Sensing system                                             | Methods          | Linear range (μM) | Detect limit (μM) | Reference |
|------------------------------------------------------------|------------------|-------------------|-------------------|-----------|
| MoS <sub>2</sub> /polyaniline                              | Fluorescence     | 60–700            | 25                | 1         |
| Ag NPs-N-GQDs-TMB-H <sub>2</sub> O <sub>2</sub>            | Colorimetry      | 0.10–157.6        | 0.031             | 2         |
| MPA-Mn:ZnS QDs-KMnO <sub>4</sub>                           | Phosphorimetry   | 0.30–280          | 0.097             | 3         |
| Mesoporous carbon                                          | Electrochemistry | 0–5000            | 0.09              | 4         |
| g-C <sub>3</sub> N <sub>4</sub> nanosheet-MnO <sub>2</sub> | Fluorescence     | 0–2000            | 0.2               | 5         |
| CBT-Cys (SEt)                                              | UV spectra       | 0–87              | 1.0               | 6         |
| erythrocyte-like Cu <sub>1.8</sub> S                       | Colorimetry      | 500-10000         | 60                | This work |

1. N. Zhang, W. G. Ma, D. X. Han, L. G. Wang, T. S. Wu and L. Niu, *Talanta*, 2015, **144**, 551–558.
2. J. Ju, R. Z. Zhang and W. Chen, *Sens. Actuators, B*, 2016, **228**, 66–73.
3. Q. Jin, Y. Li, J. Z. Huo and X. J. Zhao, *Sens. Actuators, B*, 2016, **227**, 108–116
4. J. C. Ndamanisha, J. Bai, B. Qi and L. Guo, *Anal. Biochem.*, 2009, **386**, 79–84.
5. X. L. Zhang, C. Zheng, S. S. Guo, J. Li, H. H. Yang, G. N. Chen, *Anal. Chem.* 2014, **86**, 3426–3434.
6. Y. Yuan, J. Zhang, M.J. Wang, B. Mei, Y.F. Guan, G.L. Liang, *Anal. Chem.* 2013, **85**, 1280–1284.
